# Supplementary material for: Rational Design of a Polyurethane Foam
Source: MDPI journal article supplement (doi:10.3390/polym14235111), 2022-11-24
Supplement: s1 [file s1]

**Table S1:** Polyurethane foam formulations for experiments 1-4.

| Exp | Sample | Amount /PPHP    |                 |       |                  |                  |          |          |                    | Total  |
|-----|--------|-----------------|-----------------|-------|------------------|------------------|----------|----------|--------------------|--------|
|     |        | Voranol<br>1447 | Voranol<br>3322 | Water | Vorasurf<br>5906 | Vorasurf<br>5959 | Dabco T  | Cloisite | SpecFlex<br>NE 112 |        |
| 1   | F05_01 | 75              | 25              | 4     | 1.5              | 0                | 0        | 5        | 81.10              | 191.60 |
|     | F05_02 | 75              | 25              | 4     | 1.5              | 0                | 0.3      | 5        | 81.22              | 192.02 |
|     | F05_03 | 75              | 25              | 4     | 1.5              | 0                | 0.6      | 5        | 81.34              | 192.44 |
|     | F05_04 | 75              | 25              | 4     | 1.5              | 0                | 0.9      | 5        | 81.46              | 192.86 |
|     | F05_05 | 75              | 25              | 4     | 1.5              | 0                | 1.2      | 5        | 81.58              | 193.28 |
|     | F05_06 | 75              | 25              | 4     | 1.5              | 0                | 1.5      | 5        | 81.70              | 193.70 |
|     | F05_07 | 75              | 25              | 4     | 1.5              | 0                | 1.8      | 5        | 81.82              | 194.12 |
|     | F05_08 | 75              | 25              | 4     | 1.5              | 0                | 2.1      | 5        | 81.94              | 194.54 |
| 2   | F05_09 | 75              | 25              | 4     | 0                | 0                | 0.8      | 5        | 80.71              | 190.51 |
|     | F05_10 | 75              | 25              | 4     | 0.25             | 0                | 0.8      | 5        | 80.83              | 190.88 |
|     | F05_11 | 75              | 25              | 4     | 0.5              | 0                | 0.8      | 5        | 80.95              | 191.25 |
|     | F05_12 | 75              | 25              | 4     | 0.75             | 0                | 0.8      | 5        | 81.06              | 191.61 |
|     | F05_13 | 75              | 25              | 4     | 1                | 0                | 0.8      | 5        | 81.18              | 191.98 |
|     | F05_14 | 75              | 25              | 4     | 2                | 0                | 0.8      | 5        | 81.65              | 193.45 |
|     | F05_15 | 75              | 25              | 4     | 4                | 0                | 0.8      | 5        | 82.60              | 196.40 |
| 3   | F05_28 | 75              | 25              | 4     | 1                | 0.1              | 0.8      | 5        | 81.26              | 192.16 |
|     | F05_29 | 75              | 25              | 4     | 1                | 0.2              | 0.8      | 5        | 81.34              | 192.34 |
|     | F05_30 | 75              | 25              | 4     | 1                | 0.3              | 0.8      | 5        | 81.42              | 192.52 |
|     | F05_31 | 75              | 25              | 4     | 1                | 0.5              | 0.8      | 5        | 81.57              | 192.87 |
|     | F05_32 | 75              | 25              | 4     | 1                | 1                | 0.8      | 5        | 81.96              | 193.76 |
|     | F05_33 | 75              | 25              | 4     | 1                | 2                | 0.8      | 5        | 82.74              | 195.54 |
|     | F05_34 | 75              | 25              | 4     | 1                | 0                | 0.8      | 5        | 81.18              | 191.98 |
|     | F05_35 | 75              | 25              | 4     | 1                | 3                | 0.8      | 5        | 83.52              | 197.32 |
|     | F05_36 | 75              | 25              | 4     | 1                | 4                | 0.8      | 5        | 84.30              | 199.10 |
| 4   | F05_37 | 75              | 25              | 4     | 0.8              | 1.5              | 0.875    | 5        | 82.29              | 194.46 |
|     | F05_38 | 75              | 25              | 4     | 1.7              | 1                | 0.75     | 5        | 82.27              | 194.72 |
|     | F05_39 | 75              | 25              | 4     | 2                | 1                | 0.5      | 5        | 82.31              | 194.81 |
|     | F05_40 | 75              | 25              | 4     | 1.7              | 3                | 0.5      | 5        | 83.73              | 197.93 |
|     | F05_41 | 75              | 25              | 4     | 2                | 1                | 1        | 5        | 82.51              | 195.51 |
|     | F05_42 | 75              | 25              | 4     | 0.8              | 3                | 1        | 5        | 83.51              | 197.31 |
|     | F05_43 | 75              | 25              | 4     | 2                | 3                | 0.625    | 5        | 83.92              | 198.55 |
|     | F05_44 | 75              | 25              | 4     | 0.8              | 3                | 0.5      | 5        | 83.31              | 196.61 |
|     | F05_45 | 75              | 25              | 4     | 0.8              | 2.5              | 0.625    | 5        | 82.97              | 195.89 |
|     | F05_46 | 75              | 25              | 4     | 2                | 3                | 1        | 5        | 84.07              | 199.07 |
|     | F05_47 | 75              | 25              | 4     | 1.7              | 2                | 1        | 5        | 83.15              | 196.85 |
|     | F05_48 | 75              | 25              | 4     | 1.1              | 1.5              | 0.590335 | 5        | 82.32              | 194.51 |
|     | F05_49 | 75              | 25              | 4     | 0.8              | 1                | 1        | 5        | 81.95              | 193.75 |
|     | F05_50 | 75              | 25              | 4     | 1.1              | 2.590057         | 0.875    | 5        | 83.28              | 196.85 |
|     | F05_51 | 75              | 25              | 4     | 0.8              | 1                | 0.5      | 5        | 81.75              | 193.05 |
|     | F05_52 | 75              | 25              | 4     | 2                | 2.5              | 0.5      | 5        | 83.48              | 197.48 |
